# Supplementary material for: The Cellular Proteins Grb2 and DDX3 Are Increased upon Human Cytomegalovirus Infection and Act in a Proviral Fashion
Source: PubMed Central journal article supplement (PMC4509573; doi:10.1371/journal.pone.0131614), 2015-06-29
Supplement: pone.0131614.s006.pdf [file pone.0131614.s006.pdf]

**S3 Table:** Characteristics of proteins found differentially represented between virions of TB40/E wild type and the respective pp65 deletion mutant

| DeCyder analysis |         | Mr / pI    | Mr / pI    | mass spectrometric analysis |          |        | accession   | protein                           |
|------------------|---------|------------|------------|-----------------------------|----------|--------|-------------|-----------------------------------|
| wt/mut           | t-test  | predicted  | in gel     | seq cov                     | peptides | mascot |             |                                   |
| 6.59             | 0.00025 | 25.1 / 6.1 | 25.1 / 5.9 | 15.20                       | 4        | 125.0  | gi 47496673 | Grb2                              |
| 5.05             | 0.005   | 73.0 / 7.2 | 73.0 / 6.7 | 3.20                        | 2        | 67.8   | gi 2580556  | DDX3Y                             |
| 3.70             | 0.042   | 25.1 / 6.1 | 25.1 / 5.6 | 32.71                       | 9        | 471.2  | gi 47496673 | Grb2                              |
| 3.50             | 0.004   | 21.1 / 9.1 | 20.0 / 8.0 | 24.46                       | 6        | 273.7  | gi 29423456 | UL26 (HCMV)                       |
| 3.07             | 0.022   | 73.2 / 6.8 | 73.0 / 6.8 | 25.52                       | 18       | 768.6  | gi 87196351 | DDX3X                             |
| 2.96             | 0.021   | 23.9 / 9.5 | 28.0 / 8.6 | 18.77                       | 6        | 338.8  | gi 62896867 | CHMP2B                            |
| 2.96             | 0.021   | 27.0 / 7.9 | 28.0 / 8.6 | 15.57                       | 6        | 213.6  | gi 6166390  | CYB5R2                            |
| 2.24             | 0.032   | 20.9 / 9.0 | 27.3 / 6.0 | 22.10                       | 5        | 229.9  | gi 39842106 | UL99 (HCMV)                       |
| 2.20             | 0.0078  | 21.8 / 9.9 | 27.5 / 8.0 | 8.16                        | 2        | 73.7   | gi 39644911 | CHMP1.5                           |
| 2.20             | 0.0078  | 26.2 / 9.0 | 27.5 / 8.0 | 10.52                       | 3        | 129.4  | gi 41350397 | CACYBP                            |
| 2.19             | 0.044   | 20.9 / 9.0 | 27.5 / 6.2 | 10.00                       | 2        | 43.5   | gi 39842106 | UL99 (HCMV)                       |
| 2.06             | 0.022   | 20.9 / 9.0 | 27.0 / 6.4 | 10.00                       | 2        | 46.6   | gi 39842106 | UL99 (HCMV)                       |
| 1.95             | 0.07    | 20.9 / 9.0 | 28.5 / 5.5 | 14.21                       | 3        | 110.0  | gi 39842106 | UL99 (HCMV)                       |
| 1.92             | 0.044   | 20.9 / 9.0 | 27.5 / 5.8 | 22.10                       | 5        | 178.3  | gi 39842106 | UL99 (HCMV)                       |
| 1.89             | 0.030   | 37.5 / 5.9 | 38.0 / 5.9 | 3.05                        | 1        | 48.3   | gi 54696354 | PP1                               |
| 1.88             | 0.041   | 45.7 / 4.9 | 52.0 / 4.9 | 12.46                       | 4        | 127.6  | gi 28373252 | UL71 (HCMV)                       |
| 1.73             | 0.019   | 21.7 / 6.3 | 23.0 / 6.4 | 24.48                       | 5        | 226.2  | gi 20531765 | CLDD6. hypothetical protein       |
| 1.67             | 0.027   | 16.8 / 4.9 | 17.0 / 5.2 | 6.52                        | 2        | 46.5   | gi 12653915 | eIF-5A                            |
| 1.60             | 0.047   | 21.6 / 6.2 | 25.1 / 6.1 | 21.69                       | 5        | 223.5  | gi 55962165 | RHOC                              |
| 1.55             | 0.015   | 68.4 / 5.0 | 76.0 / 5.3 | 20.80                       | 13       | 770.1  | gi 81097637 | cytoplasmic dynein intermediate   |
| -1.78            | 0.00027 | 47.2 / 4.8 | 49.0 / 4.9 | 14.50                       | 6        | 305.4  | gi 12803811 | ENO2. Enolase 2                   |
| -1.92            | 0.044   | 38.6 / 8.5 | 37.0 / 5.3 | 17.40                       | 6        | 225.0  | gi 18645167 | Annexin A2                        |
| -2.33            | 0.0016  | 29.9 / 4.6 | 27.0 / 5.5 | 27.92                       | 9        | 477.5  | gi 49119653 | YWHAZ                             |
| -2.65            | 0.0023  | 29.4 / 5.4 | 29.5 / 5.4 | 19.01                       | 5        | 271.2  | gi 40226101 | Actin beta                        |
| -2.69            | 0.00005 | 29.8 / 5.5 | 28.0 / 5.5 | 19.11                       | 12       | 493.3  | gi 49456373 | PHB. prohibitin                   |
| -2.75            | 0.0027  | 41.0 / 5.5 | 40.0 / 5.8 | 23.36                       | 17       | 697.6  | gi 14250401 | Actin beta                        |
| -2.99            | 0.02    | 36.0 / 9.3 | 37.0 / 8.8 | 6.56                        | 2        | 49.0   | gi 31645    | GAPDH                             |
| -3.35            | 0.00048 | 13.8 / 8.9 | 12.5 / 8.9 | 31.50                       | 4        | 148.7  | gi 825616   | 124 aa fragment of beta actin     |
| -3.44            | 0.0015  | 41.0 / 5.5 | 40.0 / 5.7 | 7.75                        | 2        | 64.8   | gi 14250401 | Actin beta                        |
| -4.26            | 0.042   | 15.1 / 9.7 | 11.5 / 6.8 | 25.53                       | 3        | 90.1   | gi 1335076  | Alpha-2-globin (cleavage product) |
| -4.57            | 0.0031  | 41.0 / 5.5 | 40.0 / 5.6 | 22.00                       | 12       | 441.6  | gi 14250401 | Actin beta                        |
| -7.57            | 0.018   | 15.1 / 9.7 | 11.5 / 8.2 | 11.34                       | 2        | 73.1   | gi 1335076  | Alpha-2-globin (cleavage product) |

wt/mut = ratio of protein amount between wild type virions and mutant virions

Mr = relative molecular mass

pI = isoelectric point

Seq cov = sequence coverage [%]

Peptide = number of unique peptides

Mascot = mascot score

(HCMV) = viral protein
